# Supplementary material
Source: PubMed Central journal article supplement (PMC3685273)
Supplement: supp_2012.071910_2012_071910-Contributions.pdf [file supp_2012.071910_2012_071910-Contributions.pdf]

**Manuscript no. HAEMATOL/ 2012/071910 entitled “Association between B-cell receptor responsiveness and disease progression in B-cell chronic lymphocytic leukemia: results from single cell network profiling studies”**

**Authors: Alessandra Cesano, Omar Perbellini, Erik Evensen, Charles C. Chu, Federica Cioffi, Jason Ptacek, Rajendra N Damle, Roberto Chignola, James Cordeiro, Xiao-jie Yan, Rachael E. Hawtin, Ilaria Nichele, Jodi R. Ware, Chiara Cavallini, Ornella Lovato, Roberta Zanotti, Kanti R. Rai, Nicholas Chiorazzi, Giovanni Pizzolo, and Maria T. Scupoli**

**Information about the contributions of each person named as having participated in the study**

**1) Guarantor(s), i.e., person(s) who is (are) responsible for the integrity of the work as a whole:**

- Maria T. Scupoli, Interdepartmental Laboratory for Medical Research (LURM), University of Verona, Verona, Italy, mariateresa.scupoli@univr.it
- Alessandra Cesano, Nodality Inc., South San Francisco, CA, USA, alessandra.cesano@nodality.com

According to the International Committee of Medical Journal Editors (ICMJE) ([http://www.icmje.org/ethical\\_1author.html](http://www.icmje.org/ethical_1author.html)): “Authorship credit should be based on: 1) substantial contributions to conception and design, acquisition of data, or analysis and interpretation of data; 2) drafting the article or revising it critically for important intellectual content; and 3) final approval of the version to be published. Authors should meet conditions 1, 2, and 3 ..... Acquisition of funding, collection of data, or general supervision of the research group alone does not constitute authorship”.

**The guarantors of this manuscript confirm that all persons designated as authors qualify for authorship, and that each author has participated sufficiently in the work to take public responsibility for appropriate portions of the content.**

**2) Authors who participated in the conception of the study:**

- Alessandra Cesano and Maria T. Scupoli were responsible for the conception of the study

**3) Design & Methods. The following authors were responsible for specific investigations:**

- Omar Perbellini, Federica Cioffi, Chiara Cavallini, Ornella Lovato, Jason Ptacek and James Cordeiro were responsible for flow cytometry experiments
- Ilaria Nichele, Charles C.Chu, Rajendra N. Damle, Xiao-jie Yan were responsible for collecting patients samples and providing clinical data
- Rajendra N. Damle, Jodi R. Ware, Roberta Zanotti were responsible for centralization of CLL samples

**4) Results. The following authors were responsible for specific portions of the results, including figures and tables:**

- Erik Evensen was responsible for statistical analysis and correlation with clinical outcome (Figures 2, 3, S3, S4, S5 and S6; Tables 1 and 2)
- Omar Perbellini, Federica Cioffi, Jason Ptacek, James Cordeiro, Chiara Cavallini, Ornella Lovato were responsible for acquisition and analysis of flow cytometry data (Figure 1A, B, C; Figure S2; Table S3; Table S4; Table S5)
- Roberto Chignola was responsible for correlation analysis between phosphoprotein statuses (Figure 1D)
- Jason Ptacek, Rajendra N. Damle and Ilaria Nichele were responsible for clinical data in Table S1 and S2

**5) Writing the manuscript. The following authors were responsible for writing the manuscript:**

- Alessandra Cesano and Maria T. Scupoli were responsible for writing the manuscript
- Roberto Chignola, Rachael E. Hawtin, Kanti R. Rai, Nicholas Chiorazzi and Giovanni Pizzolo critically revised the manuscript

**6) Contributors Listed in Acknowledgments:**

Acknowledgments. This study was funded by: Regione Veneto, Ricerca Sanitaria Finalizzata; Fondazione G. Berlucci per la Ricerca sul Cancro; Fondazione Cassa di Risparmio di Verona, Vicenza, Belluno e Ancona and Associazione Italiana Ricerca sul Cancro (AIRC) (grant #6599); Fondazione Cassa di Risparmio di Verona, Vicenza, Belluno, e Ancona (grant #2008.14.44). This work was also supported in part by research funding from Nodality Inc. to AC, EE, JP, JC, REH, and JRW. This study was supported in part by NIH grant RO1 CA81554 to NC.
